# Supplementary material for: Optimization and Validation of Dispersive Liquid–Liquid Microextraction for Simultaneous Determination of Aflatoxins B1, B2, G1, and G2 in Senna Leaves and Pods Using HPLC-FLD with Pre-Column Derivatization
Source: MDPI journal article supplement (doi:10.3390/toxins15040277), 2023-04-07
Supplement: s1 [file s1]

# Supplementary Materials: Optimization and Validation of Dispersive Liquid–Liquid Microextraction for Simultaneous Determination of Aflatoxins B1, B2, G1, and G2 in Senna Leaves and Pods using HPLC-FLD with Pre-Column Derivatization

Thanapoom Maneeboon, Chananya Chuaysrinule and Warapa Mahakarnchanakul

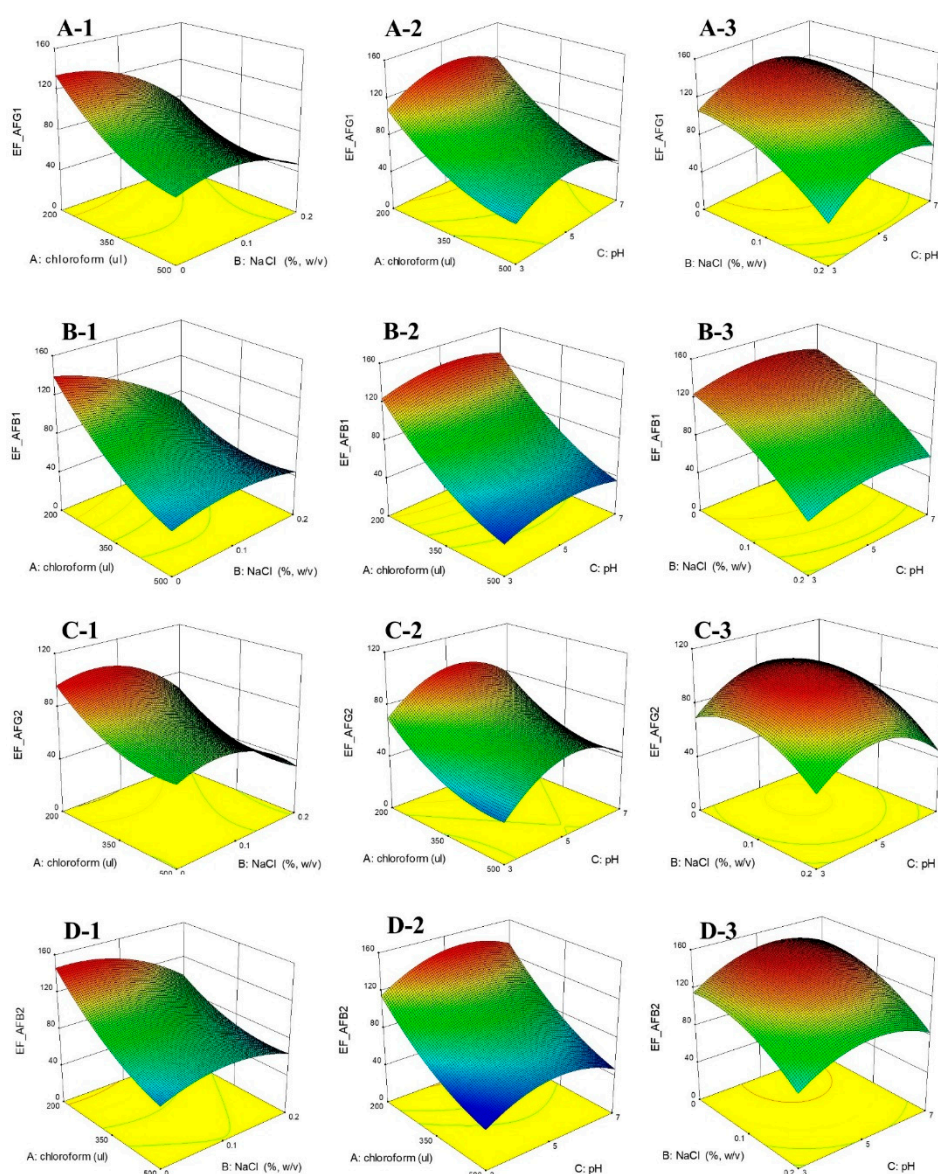

**Figure S1.** Response surface plots presenting the effect of independent variables on EF values of AFG1 (A), AFB1 (B), AFG2 (C), and AFB2 (D): volume of chloroform and salt addition (1), volume of chloroform and pH of aqueous solution (2), and salt addition and pH of aqueous solution (3)
